# Supplementary material for: A strongly adhering ZnO crystal layer via a seed/buffer-free, low-temperature direct growth on a polyimide film via a solution process
Source: Royal Society of Chemistry journal article supplement (doi:10.1039/d0ce00961j), 2020-01-01
Supplement: d0ce00961j1.pdf [file d0ce00961j1.pdf]

*Electronic supplementary information*

# Strongly Adhering ZnO Crystal Layer via Seed/buffer-free, Low-Temperature Direct Growth on a Polyimide Film Using Solution Process

*Kazuyuki Shishino*<sup>1,5</sup>, *Tetsuya Yamada*<sup>2</sup>, *Masao Arai*<sup>4</sup>, *Munekazu Ikeda*<sup>5</sup>, *Hajime Hirata*<sup>5</sup>, *Masashi Motoi*<sup>6</sup>, *Tatsuo Hatakeyama*<sup>7</sup>, and *Katsuya Teshima*<sup>2,3,\*</sup>

<sup>1</sup> Graduate School of Medicine, Science and Technology, Shinshu University, 4-17-1 Wakasato, Nagano 380-8553, Japan

<sup>2</sup> Research Initiative for Supra-Materials, Shinshu University, 4-17-1 Wakasato, Nagano 380-8553, Japan

<sup>3</sup> Department of Materials Chemistry, Faculty of Engineering, Shinshu University, 4-17-1 Wakasato, Nagano 380-8553, Japan

<sup>4</sup> Production Dept, Production Team, Raytech, INC, 2-19-2 Nakadai, Kawagoe-City, Saitama, Japan

<sup>5</sup> Research & Development Div, Toray Engineering Co., Ltd., 1-1, Sonoyama 1-chome, Otsu, Shiga, Japan

<sup>6</sup> Development Team, Business Div. II, Mechatronics & Fine Technology Business Div, Toray Engineering Co., Ltd., 1-45, Oe 1-chome, Otsu, Shiga, Japan

<sup>7</sup> Development Team, Business Div. I, Mechatronics & Fine Technology Business Div, Toray Engineering Co., Ltd., 1-45, Oe 1-chome, Otsu, Shiga, Japan

\* Corresponding author's email: [teshima@shinshu-u.ac.jp](mailto:teshima@shinshu-u.ac.jp)

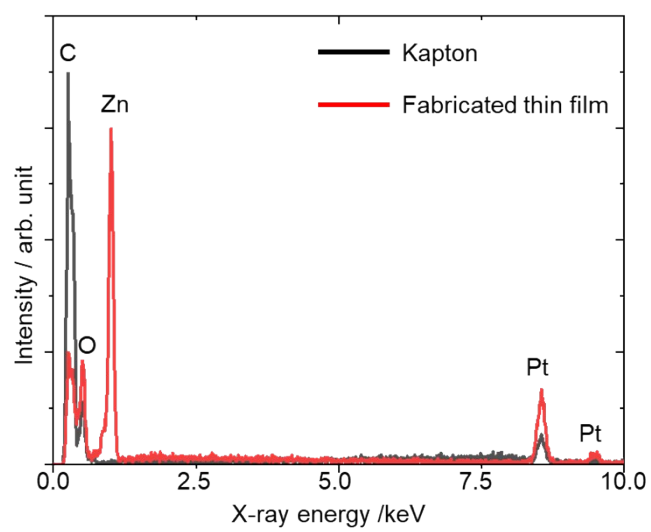

Figure S1. Surficial EDS spectra of Kapton and the fabricated product.
